# Supplementary material
Source: PubMed Central journal article supplement (PMC6744333)
Supplement: NIHMS1535366-supplement-Supplemental_Data_File___doc___tif__pdf__etc__.pdf [file NIHMS1535366-supplement-Supplemental_Data_File___doc___tif__pdf__etc__.pdf]

Supplemental Table 1. Means and standard deviations of gait characteristics and variabilities by condition and cue rate, averaged across participants for each group. See figures for significance.

| Supplemental Table 1.  |                  | CONTROL |              |              |              |              | PD     |              |              |              |
|------------------------|------------------|---------|--------------|--------------|--------------|--------------|--------|--------------|--------------|--------------|
| GAIT CHARACTERISTICS   | Control baseline | TEMPO   | 90%          | 100%         | 110%         | PD baseline  | TEMPO  | 90%          | 100%         | 110%         |
| Velocity (cm/s)        | 133.9 (15.0)     | music   | 120.9 (15.2) | 136.1 (13.3) | 144.6 (18.0) | 123.6 (15.1) | music  | 109.7 (18.3) | 124.1 (16.2) | 134.5 (19.5) |
|                        |                  | sing    | 121.6 (16.5) | 135.3 (14.5) | 145.3 (18.2) |              | sing   | 109.0 (18.0) | 124.9 (20.4) | 135.2 (23.4) |
|                        |                  | mental  | 122.4 (17.9) | 133.8 (16.8) | 144.9 (18.7) |              | mental | 110.6 (18.4) | 124.1 (16.6) | 132.5 (20.4) |
| Cadence (steps/min)    | 112.1 (6.0)      | music   | 104.3 (6.9)  | 113.3 (6.7)  | 120.2 (7.4)  | 110.9 (7.8)  | music  | 101.9 (8.9)  | 111.1 (7.7)  | 120.4 (8.5)  |
|                        |                  | sing    | 106.0 (6.8)  | 114.4 (7.6)  | 120.0 (8.2)  |              | sing   | 103.8 (9.8)  | 112.7 (8.6)  | 118.6 (9.1)  |
|                        |                  | mental  | 106.1 (7.4)  | 112.6 (7.7)  | 118.4 (8.0)  |              | mental | 103.3 (9.3)  | 110.9 (7.6)  | 115.5 (8.9)  |
| Stride length (cm)     | 143.5 (15.3)     | music   | 139.0 (13.3) | 144.3 (12.1) | 144.3 (15.3) | 134.1 (15.6) | music  | 129.0 (16.3) | 134.2 (15.7) | 134.2 (17.0) |
|                        |                  | sing    | 137.4 (14.0) | 142.1 (13.2) | 145.3 (14.6) |              | sing   | 126.1 (15.8) | 133.0 (17.2) | 136.6 (18.7) |
|                        |                  | mental  | 138.0 (14.7) | 142.7 (13.9) | 146.6 (14.3) |              | mental | 128.4 (15.9) | 134.5 (16.1) | 137.5 (16.6) |
| GAIT VARIABILITIES     | -                | TEMPO   | 90%          | 100%         | 110%         |              | TEMPO  | 90%          | 100%         | 110%         |
| Stride length SD       | 3.1 (0.9)        | music   | 4.4 (1.7)    | 3.9 (1.7)    | 3.3 (1.2)    | 3.6 (1.7)    | music  | 4.5 (1.6)    | 5.3 (3.1)    | 4.3 (1.8)    |
|                        |                  | sing    | 3.5 (1.5)    | 3.3 (1.3)    | 3.3 (1.3)    |              | sing   | 3.7 (1.6)    | 3.3 (1.2)    | 3.7 (1.2)    |
|                        |                  | mental  | 2.9 (1.1)    | 3.5 (2.0)    | 3.4 (1.3)    |              | mental | 3.4 (1.2)    | 3.4 (1.7)    | 3.1 (1.4)    |
| Stride time SD         | 0.02 (0.01)      | music   | 0.03 (0.02)  | 0.02 (0.01)  | 0.02 (0.008) | 0.02 (0.01)  | music  | 0.03 (0.01)  | 0.03 (0.01)  | 0.02 (0.01)  |
|                        |                  | sing    | 0.02 (0.01)  | 0.02 (0.01)  | 0.02 (0.001) |              | sing   | 0.03 (0.01)  | 0.02 (0.01)  | 0.02 (0.01)  |
|                        |                  | mental  | 0.02 (0.01)  | 0.02 (0.01)  | 0.02 (0.005) |              | mental | 0.03 (0.01)  | 0.02 (0.01)  | 0.02 (0.01)  |
| Single support time SD | 0.01 (0.004)     | music   | 0.02 (0.01)  | 0.02 (0.007) | 0.01 (0.004) | 0.01 (0.004) | music  | 0.02 (0.01)  | 0.02 (0.007) | 0.01 (0.01)  |
|                        |                  | sing    | 0.01 (0.004) | 0.01 (0.003) | 0.01 (0.005) |              | sing   | 0.02 (0.01)  | 0.01 (0.005) | 0.01 (0.004) |
|                        |                  | mental  | 0.01 (0.005) | 0.01 (0.004) | 0.01 (0.003) |              | mental | 0.02 (0.01)  | 0.01 (0.004) | 0.01 (0.004) |
| Gait Asymmetry         | 1.81 (1.7)       | music   | 1.74 (1.1)   | 1.81 (1.3)   | 1.67 (1.3)   | 3.87 (2.8)   | music  | 3.45 (2.2)   | 2.85 (2.1)   | 3.53 (2.2)   |
|                        |                  | sing    | 1.87 (1.6)   | 1.56 (1.2)   | 1.24 (1.0)   |              | sing   | 3.73 (2.2)   | 3.12 (2.3)   | 3.22 (2.8)   |
|                        |                  | mental  | 1.59 (1.3)   | 1.58 (1.4)   | 1.62 (0.9)   |              | mental | 3.57 (2.5)   | 3.13 (2.4)   | 3.04 (2.5)   |
